# Supplementary material for: A hybrid cobalt disulfonate with a novel inorganic layer architecture exhibiting a field-induced magnetic transition
Source: Royal Society of Chemistry journal article supplement (doi:10.1039/b816815f), 2009-01-01
Supplement: b816815f.pdf [file b816815f.pdf]

**Electronic Supplementary Information for**

**A Hybrid Cobalt Disulfonate with a Novel  
Inorganic Layer Architecture Exhibiting a Field-  
Induced Magnetic Transition**

by Russell K. Feller, Brent C. Melot, Paul M. Forster and Anthony K. Cheetham

including tables of bond lengths and angles, anisotropic displacement parameters, hydrogen coordinates and hydrogen bond parameters; powder diffractogram and thermal analysis.

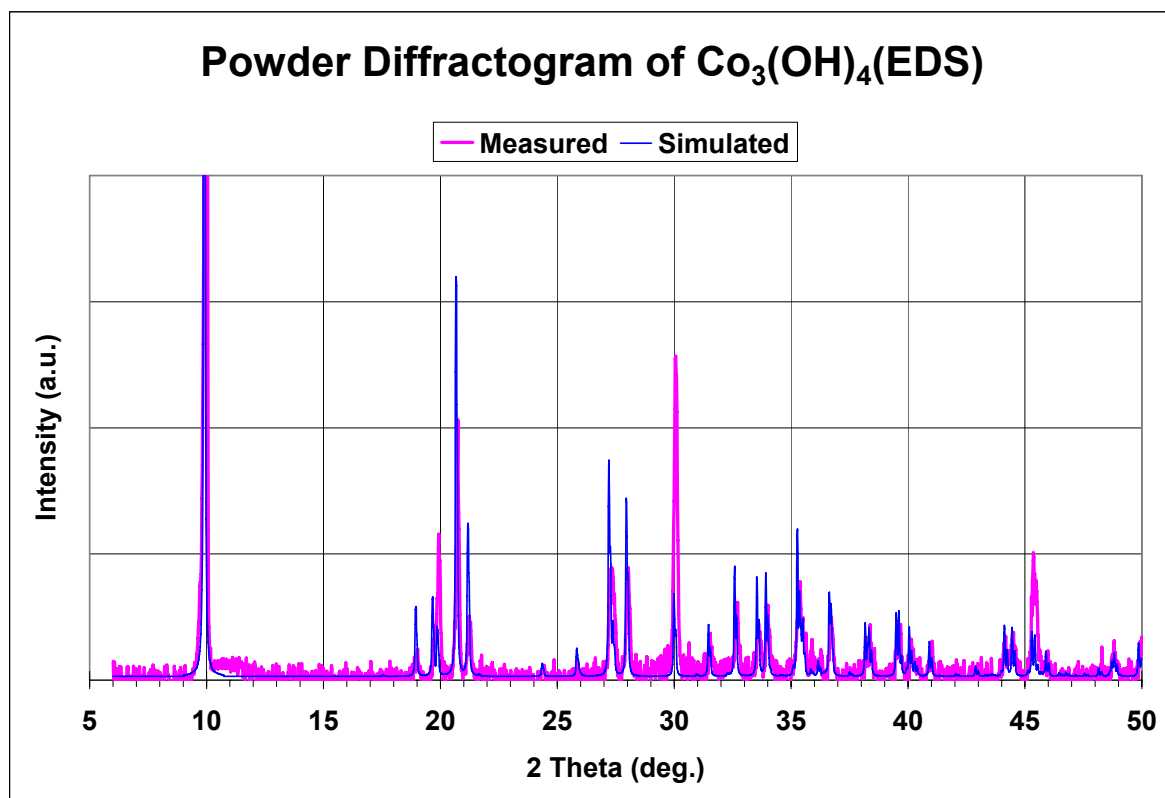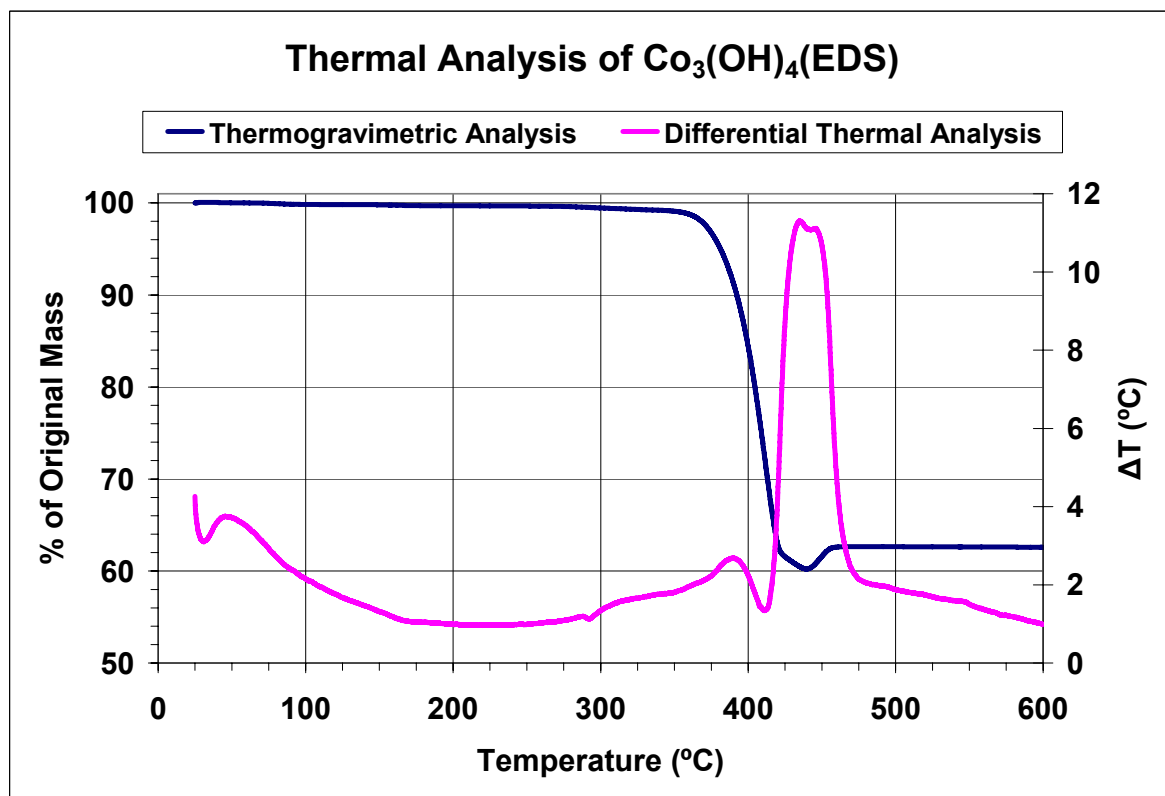

## Crystallographic Data for Co<sub>3</sub>(OH)<sub>4</sub>(EDS):

**Atomic coordinates ( $\times 10^4$ ) and equivalent isotropic displacement parameters ( $\text{\AA}^2 \times 10^3$ ):**

|       | x        | y        | z        | U <sub>eq</sub> |
|-------|----------|----------|----------|-----------------|
| Co(1) | 0        | 0        | 0        | 11(1)           |
| Co(2) | -801(1)  | -4787(1) | 1402(1)  | 12(1)           |
| S(1)  | -3208(1) | -12(1)   | 1538(1)  | 13(1)           |
| C(1)  | -4973(3) | 502(6)   | 700(3)   | 16(1)           |
| O(1)  | -2902(2) | -2734(4) | 1514(2)  | 20(1)           |
| O(2)  | -2120(2) | 1445(4)  | 791(2)   | 17(1)           |
| O(3)  | -3333(2) | 935(4)   | 2874(2)  | 21(1)           |
| O(4)  | -571(2)  | 1543(4)  | -1821(2) | 14(1)           |
| O(5)  | -916(2)  | -3375(3) | -513(2)  | 14(1)           |

(U<sub>eq</sub> is defined as one third of the trace of the orthogonalized U<sup>ij</sup> tensor)

**Bond lengths [ $\text{\AA}$ ] and angles [ $^\circ$ ]:**

|              |            |                     |            |
|--------------|------------|---------------------|------------|
| Co(1)-O(5)   | 2.0171(18) | S(1)-C(1)           | 1.771(3)   |
| Co(1)-O(5)#1 | 2.0171(18) | C(1)-C(1)#5         | 1.512(5)   |
| Co(1)-O(4)#1 | 2.0532(17) | C(1)-H(1)           | 0.98(3)    |
| Co(1)-O(4)   | 2.0532(17) | C(1)-H(2)           | 0.99(3)    |
| Co(1)-O(2)   | 2.2349(18) | O(2)-Co(2)#6        | 2.3774(19) |
| Co(1)-O(2)#1 | 2.2349(18) | O(4)-Co(2)#7        | 2.0250(17) |
| Co(2)-O(4)#2 | 2.0250(17) | O(4)-Co(2)#1        | 2.1362(19) |
| Co(2)-O(5)#3 | 2.0667(18) | O(4)-H(3)           | 0.83(4)    |
| Co(2)-O(5)   | 2.0736(19) | O(5)-Co(2)#3        | 2.0667(18) |
| Co(2)-O(4)#1 | 2.1362(19) | O(5)-H(4)           | 0.80(4)    |
| Co(2)-O(1)   | 2.1787(19) | -----               |            |
| Co(2)-O(2)#4 | 2.3774(19) | O(5)-Co(1)-O(5)#1   | 180.00(11) |
| S(1)-O(3)    | 1.4526(19) | O(5)-Co(1)-O(4)#1   | 87.53(7)   |
| S(1)-O(1)    | 1.464(2)   | O(5)#1-Co(1)-O(4)#1 | 92.47(7)   |
| S(1)-O(2)    | 1.4822(19) | O(5)-Co(1)-O(4)     | 92.47(7)   |

Supplementary material (ESI) for Journal of Materials Chemistry  
 This journal is © The Royal Society of Chemistry 2009

|                     |            |                      |            |
|---------------------|------------|----------------------|------------|
| O(5)#1-Co(1)-O(4)   | 87.53(7)   | O(3)-S(1)-O(2)       | 112.65(12) |
| O(4)#1-Co(1)-O(4)   | 180.00(11) | O(1)-S(1)-O(2)       | 111.89(11) |
| O(5)-Co(1)-O(2)     | 93.06(7)   | O(3)-S(1)-C(1)       | 106.19(12) |
| O(5)#1-Co(1)-O(2)   | 86.94(7)   | O(1)-S(1)-C(1)       | 107.76(13) |
| O(4)#1-Co(1)-O(2)   | 89.23(7)   | O(2)-S(1)-C(1)       | 105.63(12) |
| O(4)-Co(1)-O(2)     | 90.77(7)   | C(1)#5-C(1)-S(1)     | 112.0(2)   |
| O(5)-Co(1)-O(2)#1   | 86.94(7)   | C(1)#5-C(1)-H(1)     | 110.6(19)  |
| O(5)#1-Co(1)-O(2)#1 | 93.06(7)   | S(1)-C(1)-H(1)       | 103(2)     |
| O(4)#1-Co(1)-O(2)#1 | 90.77(7)   | C(1)#5-C(1)-H(2)     | 118(2)     |
| O(4)-Co(1)-O(2)#1   | 89.23(7)   | S(1)-C(1)-H(2)       | 97(2)      |
| O(2)-Co(1)-O(2)#1   | 180.00(9)  | H(1)-C(1)-H(2)       | 115(3)     |
| O(4)#2-Co(2)-O(5)#3 | 97.60(7)   | S(1)-O(1)-Co(2)      | 130.69(11) |
| O(4)#2-Co(2)-O(5)   | 173.06(7)  | S(1)-O(2)-Co(1)      | 126.95(11) |
| O(5)#3-Co(2)-O(5)   | 76.12(8)   | S(1)-O(2)-Co(2)#6    | 129.23(11) |
| O(4)#2-Co(2)-O(4)#1 | 99.38(4)   | Co(1)-O(2)-Co(2)#6   | 87.73(6)   |
| O(5)#3-Co(2)-O(4)#1 | 91.75(7)   | Co(2)#7-O(4)-Co(1)   | 128.59(10) |
| O(5)-Co(2)-O(4)#1   | 83.93(7)   | Co(2)#7-O(4)-Co(2)#1 | 124.87(9)  |
| O(4)#2-Co(2)-O(1)   | 103.00(7)  | Co(1)-O(4)-Co(2)#1   | 91.68(7)   |
| O(5)#3-Co(2)-O(1)   | 157.17(8)  | Co(2)#7-O(4)-H(3)    | 103(2)     |
| O(5)-Co(2)-O(1)     | 82.72(7)   | Co(1)-O(4)-H(3)      | 104(2)     |
| O(4)#1-Co(2)-O(1)   | 94.48(7)   | Co(2)#1-O(4)-H(3)    | 100(3)     |
| O(4)#2-Co(2)-O(2)#4 | 82.61(7)   | Co(1)-O(5)-Co(2)#3   | 103.08(8)  |
| O(5)#3-Co(2)-O(2)#4 | 82.15(7)   | Co(1)-O(5)-Co(2)     | 94.58(8)   |
| O(5)-Co(2)-O(2)#4   | 93.48(7)   | Co(2)#3-O(5)-Co(2)   | 103.88(8)  |
| O(4)#1-Co(2)-O(2)#4 | 173.80(7)  | Co(1)-O(5)-H(4)      | 119(3)     |
| O(1)-Co(2)-O(2)#4   | 90.76(7)   | Co(2)#3-O(5)-H(4)    | 115(2)     |
| O(3)-S(1)-O(1)      | 112.21(12) | Co(2)-O(5)-H(4)      | 118(2)     |

---

Symmetry transformations used to generate equivalent atoms:

#1 -x,-y,-z #2 x,-y-1/2,z+1/2 #3 -x,-y-1,-z #4 x,y-1,z #5 -x-1,-y,-z #6 x,y+1,z #7 x,-y-1/2,z-1/2

**Anisotropic displacement parameters ( $\text{\AA}^2 \times 10^3$ ):**

|       | U <sup>11</sup> | U <sup>22</sup> | U <sup>33</sup> | U <sup>23</sup> | U <sup>13</sup> | U <sup>12</sup> |
|-------|-----------------|-----------------|-----------------|-----------------|-----------------|-----------------|
| Co(1) | 13(1)           | 11(1)           | 10(1)           | 0(1)            | -1(1)           | 0(1)            |
| Co(2) | 13(1)           | 13(1)           | 10(1)           | 1(1)            | 0(1)            | 1(1)            |
| S(1)  | 9(1)            | 16(1)           | 12(1)           | 0(1)            | -1(1)           | 1(1)            |
| C(1)  | 10(1)           | 22(1)           | 16(1)           | -2(1)           | -2(1)           | 1(1)            |
| O(1)  | 17(1)           | 15(1)           | 27(1)           | 3(1)            | 2(1)            | 2(1)            |
| O(2)  | 15(1)           | 18(1)           | 19(1)           | 1(1)            | 2(1)            | -1(1)           |
| O(3)  | 17(1)           | 29(1)           | 15(1)           | -4(1)           | 1(1)            | 0(1)            |
| O(4)  | 14(1)           | 15(1)           | 13(1)           | -1(1)           | -2(1)           | 3(1)            |
| O(5)  | 13(1)           | 16(1)           | 14(1)           | -1(1)           | -2(1)           | 1(1)            |

(The anisotropic displacement factor exponent takes the form:  $-2p^2 [ h^2 a^{*2} U^{11} + \dots + 2 h k a^* b^* U^{12} ]$ )

**Hydrogen coordinates ( $\times 10^4$ ) and isotropic displacement parameters ( $\text{\AA}^2 \times 10^3$ ):**

|      | x         | y         | z         | U <sub>eq</sub> |
|------|-----------|-----------|-----------|-----------------|
| H(1) | -5060(40) | 2350(60)  | 700(30)   | 31(7)           |
| H(2) | -5580(40) | -370(60)  | 1340(30)  | 31(7)           |
| H(3) | -1410(40) | 2160(70)  | -1740(30) | 30(7)           |
| H(4) | -1710(40) | -3410(70) | -920(30)  | 30(7)           |

**Hydrogen bond parameters:**

| D-H...A            | d (D-H) | d (H...A) | d (D...A) | < (DHA) |
|--------------------|---------|-----------|-----------|---------|
| O(4)-H(3)...O(3)#1 | 0.83(4) | 2.01(4)   | 2.809(3)  | 161(3)  |
| O(5)-H(4)...O(3)#2 | 0.80(4) | 2.27(4)   | 2.961(3)  | 144(4)  |

Symmetry transformations used to generate equivalent atoms: #1 x,-y+1/2,z-1/2 #2 x,-y-1/2,z-1/2
